# Supplementary material for: A combination of receptor mediated transcytosis and photothermal effect promotes BBB permeability and the treatment of meningitis using itraconazole
Source: Royal Society of Chemistry journal article supplement (doi:10.1039/d0nr04035e), 2020-01-01
Supplement: d0nr04035e1.pdf [file d0nr04035e1.pdf]

## Supporting Information

### Transcytosis and Photothermal Effect Promotes BBB Permeability and the Treatment of Meningitis of Itraconazole

*Shan-Shan Zhang<sup>a,b</sup>, Sajid Asghar<sup>c</sup>, Jun-Xiu Ye<sup>a</sup>, Ling Lin<sup>a</sup>, Qi-Neng Ping<sup>a</sup>, Zhi-Peng Chen<sup>d\*</sup>, Feng Shao<sup>e\*</sup>, and Yan-Yu Xiao<sup>a\*</sup>*

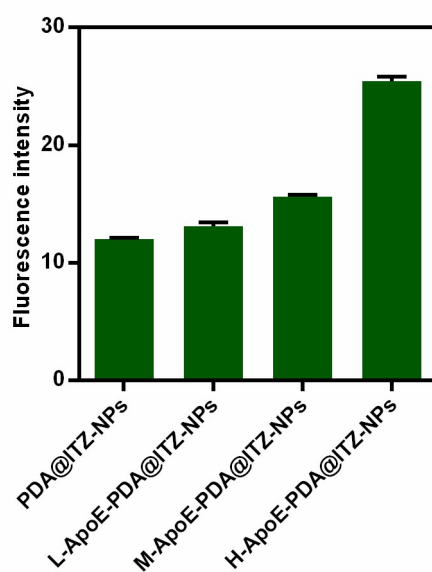

Fig. S1. The fluorescence intensity of bEnd.3 cells treated with ITZ-NPs, PDA@ITZ-NPs, and H-ApoE-PDA@ITZ-NPs for 4 h.
